# Supplementary material
Source: PubMed Central journal article supplement (PMC5029180)
Supplement: ismej2015205x1.pdf [file ismej2015205x1.pdf]

1 Supplementary Information

2 *High levels of heterogeneity in diazotroph diversity and activity within a putative hotspot for*  
3 *marine nitrogen fixation*

4 Lauren F Messer, Claire Mahaffey, Charlotte Robinson, Thomas C Jeffries, Kirralee G  
5 Baker, Jaime Bibiloni Isaksson, Martin Ostrowski, Martina A Doblin, Mark V Brown,  
6 Justin R Seymour

7

8

9 MATERIALS AND METHODS

10 Sample Collection

11 Vertical profiles of temperature, salinity, oxygen, photosynthetically active radiation (PAR),  
12 and fluorescence were measured at each site using a conductivity-temperature-depth (CTD)  
13 recorder (Seabird SBE 911; Supplementary Table 1). Samples were collected from the  
14 surface at all CTD stations and from the chlorophyll (indicated by fluorescence) maximum  
15 (cmax) when it was discernible. When the water column was well-mixed, for example  
16 exhibiting no stratification of temperature or salinity, and no peaks in fluorescence, samples  
17 were collected from the surface only.

18

19 Inorganic nutrient analysis

20 Dissolved nutrient analyses ( $\text{NO}_3^- + \text{NO}_2^-$ ,  $\text{PO}_4$ ,  $\text{NH}_3$ ,  $\text{SiO}_2$ ) were conducted on board the  
21 research vessel using fresh samples. Nitrate + nitrite, phosphate and silicate concentrations  
22 were determined via Flow Injection Analysis (Lachat; detection limit  $0.02 \mu\text{mol L}^{-1}$ ).

23 Ammonium samples were analysed using an AA3HR Segmented Flow nutrient analyser  
24 (Seal Analytical; detection limit 0.01  $\mu\text{mol L}^{-1}$ ).

25

26 Photosynthetic pigment analysis

27 Seawater samples (2.2 L) were filtered through 0.74  $\mu\text{m}$  glass fibre filters (GF/F, Whatman,  
28 UK), snap-frozen in liquid nitrogen and stored at  $-80^{\circ}\text{C}$  prior to extraction in 90% acetone.  
29 The photosynthetic and photoprotective pigment composition was measured using High  
30 Performance Liquid Chromatography (HPLC) via the gradient elution procedure of van  
31 Heukelem and Thomas (2001) on a Waters HPLC system with an Agilent 1200 series  
32 column.

33

34  $^{15}\text{N-N}_2$  Incubation Experiments

35 Briefly, acid-rinsed 4 L Nalgene polycarbonate incubation bottles were filled to overflowing  
36 via silicone tubing directly from Niskin bottles. Bottles were capped headspace free, followed  
37 by an injection of 3 ml  $^{15}\text{N-N}_2$  (98 atm%, Sigma Aldrich) using a gas tight syringe. Bottles  
38 were inverted 100 times and then maintained at *in situ* sea surface temperatures in deck board  
39 incubators continuously filled with flow-through surface seawater, and *in situ* irradiance was  
40 simulated by shading with shade cloth and appropriate layers of blue filter (061 Mist Blue,  
41 Lee Filters), according to PAR values obtained from vertical CTD casts. Samples for whole  
42 community (WC) and unicellular size fraction (USF) rates were incubated in triplicate for 24  
43 h and terminated by filtration, either directly onto a pre-combusted GF/F filter (0.7  $\mu\text{m}$ ;  
44 Whatman, Kent, UK; WC) or through a 10  $\mu\text{m}$  Isopore membrane filter (EMD Millipore,  
45 Billerica, MA, USA) and then onto a GF/F filter (USF). Filters were stored at  $-20^{\circ}\text{C}$  until

46 further analyses. At all stations, 2-4 L of seawater was filtered onto a pre-combusted GF/F  
47 (Whatman) for <sup>15</sup>N natural abundance analyses using independent sampling equipment to  
48 prevent any cross-contamination.

49 In the laboratory, GF/F filters were dried at 60 °C for 48 h and isotopic composition and total  
50 particulate nitrogen and carbon were determined using an elemental analyser (Thermo  
51 Finnigan MAT ConFlo IV) coupled to an isotope ratio mass spectrometer (Thermo Finnigan  
52 Delta XP) at the Research Corporation of the University of Hawaii. Assimilation rates were  
53 calculated as previously described (Montoya et al. 1996).

54

#### 55 RNA extraction

56 Total RNA was extracted from filters using the *mirVana* miRNA Isolation Kit (Ambion) as  
57 previously described (Frias-Lopez et al., 2008; Stewart et al., 2010), with a slight  
58 modification. Briefly, samples were thawed on ice then filters were transferred to RNase-free  
59 5 ml centrifuge tubes prior to adding 750 µl Lysis/Binding buffer (Ambion), to enable  
60 complete access to all cells on the filter. Then, total RNA was extracted following the  
61 *mirVana* protocol and genomic DNA was removed following the TURBO DNA-free  
62 (Ambion) protocol. DNase treated RNA was concentrated and purified following the  
63 manufacturer's protocol for the RNeasy MinElute Cleanup Kit (Qiagen). Total RNA was  
64 eluted in 25 µl nuclease-free water, yield was quantified using the Qubit<sup>TM</sup> RNA Assay Kit  
65 (Invitrogen) and RNA quality was checked on a Nanodrop<sup>TM</sup> spectrophotometer.

66 Superscript III<sup>TM</sup> Reverse Transcriptase was used to synthesise single stranded cDNA from  
67 purified total RNA (40 ng) using 2 pmol of gene specific nifH3 reverse primer (5'-

68 ATRTTRTTNGCNGCRTA-3'; Zani et al. 2000). Resultant *nifH* cDNA was immediately  
69 used as template for *nifH* PCR amplification.

70

71 *nifH* PCR amplification

72 DNA or cDNA template (2 µl) was added to 25 µl of GoTaq Colourless Mastermix  
73 (Promega, USA), along with 2 µl of both forward and reverse primer (0.4 µM final  
74 concentration) and 19 µl of molecular grade nuclease-free water. The first stage of the PCR  
75 used *nifH4* and *nifH3* primers and the following reaction conditions: 95 °C initial  
76 denaturation (GoTaq activation), and 30 cycles of 95 °C denaturation (1 min), 48 °C  
77 annealing (1 min) and 72 °C extension (1 min), followed by a final extension at 72 °C (10  
78 min). The second stage used the *nifH1* and *nifH2* primer pair and 1 µl of PCR product from  
79 the first stage as template, following the same reaction conditions as the first stage PCR.

80

81

82 References

83 Frias-Lopez, J., Shi, Y., Tyson, G.W., Coleman, M.L., Schuster, S.C., Chisholm, S.W., and  
84 Delong, E.F. (2008) Microbial community gene expression in ocean surface waters.  
85 *Proc. Natl. Acad. Sci. U. S. A.* **105**: 3805–10.

86 Van Heukelem, L. and Thomas, C.S. (2001) Computer-assisted high-performance liquid  
87 chromatography method development with applications to the isolation and analysis of  
88 phytoplankton pigments. *J. Chromatogr. A* **910**: 31–49.

89 Montoya, J.P., Voss, M., Kahler, P., and Capone, D.G. (1996) A Simple, High-Precision,  
90 High-Sensitivity Tracer Assay for N<sub>2</sub> Fixation. *Appl. Environ. Microbiol.* **62**: 986–93.

91 Stewart, F.J., Ottesen, E.A., and DeLong, E.F. (2010) Development and quantitative analyses  
92 of a universal rRNA-subtraction protocol for microbial metatranscriptomics. *ISME J.* **4**:  
93 896–907.

94 Zani, S., Mellon, M., Collier, J., and Zehr, J. (2000) Expression of nifH genes in natural  
95 microbial assemblages in Lake George, New York, detected by reverse transcriptase  
96 PCR. *Appl. Environ. Microbiol.* **66**: 3119–3124.

97

98

99

100

101

102

103

104

105

106

107

108

109

110

111

112

113

114

115

116

117

118

119 Supplementary Figure Legends

120

121 Supplementary Figure 1. Maximum likelihood phylogenetic tree of *nifH* nucleotide  
122 sequences recovered during this study (purple diamond) and cultured and environmental *nifH*  
123 sequences publically available. Scale bar represents 0.1 base pair substitutions, SCS= South  
124 China Sea, NPSG= North Pacific Subtropical Gyre, SPG= South Pacific Gyre. Clusters  
125 defined by Zehr et al. (2003) are indicated, as are sequences that have previously been  
126 reported as potential *nifH* PCR contaminants, and sequences attributed to be UCYN-A  
127 ecotypes (Thompson et al. 2014) and the  $\gamma$ -24774A11 group (Moisander et al. 2008, 2014).

128 Supplementary Figure 2. Relative abundance (% sequences) of *nifH* OTUs representing > 96  
129 % of sequences, in the ATS and Coral Sea during the Austral spring (SS) and winter (WS) at  
130 the surface (A and C) and cmax (B and D).

131 Supplementary Table 1. Measured biotic and abiotic parameters at each site and depth during  
132 spring 2012 (ss2012\_t07; SS) and winter 2013 (ss2013\_t03; WS) voyages.

133 Supplementary Table 2. Marginal test results from distance based linear modelling (distLM)  
134 of diazotroph (*nifH* gene) composition in relation to available predictor variables. Variables  
135 in bold displayed significant ( $P < 0.05$ ) explanatory power and were subsequently used in  
136 distance based redundancy analysis (dbRDA).

137

138
