# Supplementary material
Source: PubMed Central journal article supplement (PMC5029180)

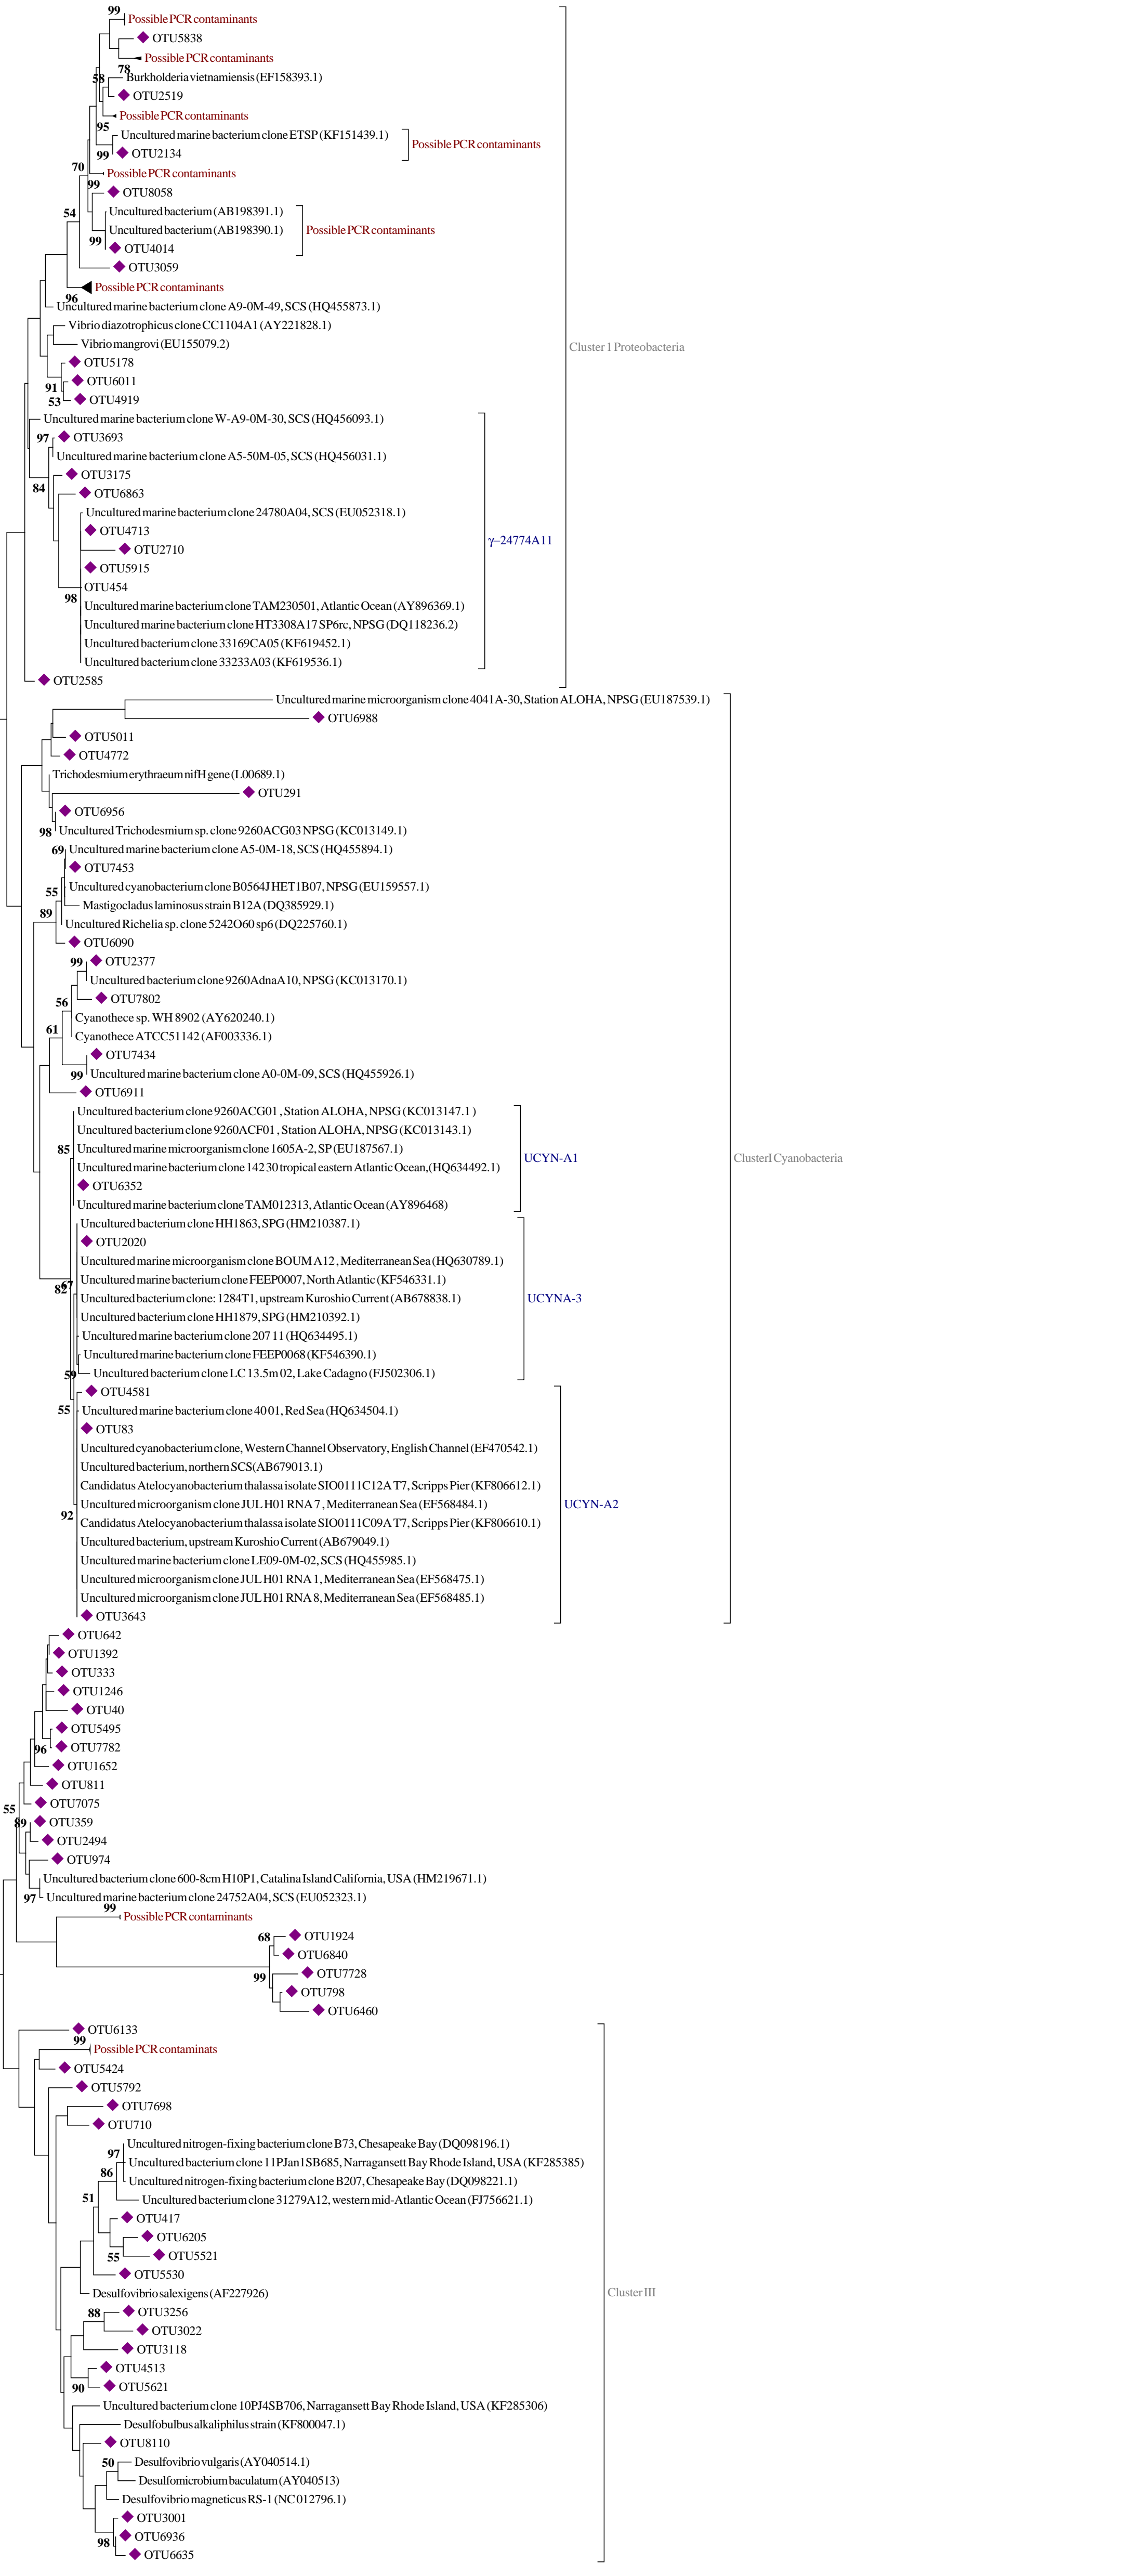

Supplement: ismej2015205x2.pdf [file ismej2015205x2.pdf]
